# Supplementary material
Source: PubMed Central journal article supplement (PMC4271207)
Supplement: supp_M114.580159_jbc.M114.580159-1.pdf [file supp_M114.580159_jbc.M114.580159-1.pdf]

## Depletion of the central metabolite NAD leads to oncosis mediated cell death

Christopher Del Nagro, Yang Xiao, Linda Rangell, Mike Reichelt, and Thomas O'Brien

### SUPPLEMENTAL FIGURES

#### SUPPLEMENTAL MOVIES

**Movie S1:** Representative bright-field images captured hourly on an incuocyte following exposure treatment of A549 cells to 200 nM GNE-617 for 48 hours.

**Movie S2:** Representative bright-field images captured hourly on an incuocyte following exposure treatment of Calu6 cells to 200 nM GNE-617 for 48 hours.

**Movie S3:** Representative bright-field images captured hourly on an incuocyte following exposure treatment of HCT116 cells to 200 nM GNE-617 for 48 hours.

**Movie S4:** Representative bright-field images captured hourly on an incuocyte following exposure treatment of PC3 cells to 200 nM GNE-617 for 48 hours.

**Movie S5:** Close-up bright-field images captured on an incuocyte of blister formation following exposure of A549 cells to 200 nM GNE-617.

**Movie S6:** Close-up bright-field images captured on an incuocyte of blister formation following exposure of Calu6 cells to 200 nM GNE-617.

**Movie S7:** Full length 102 hours bright-field images captured hourly on an incuocyte for A549 cells after treatment with 200 nM GNE-617 (extended version of Movie S1).

**Movie S8:** Full length 102 hours bright-field images captured hourly on an incuocyte for Calu6 cells after treatment with 200 nM GNE-617 (extended version of Movie S2).

**Movie S9:** Full length 102 hours bright-field images captured hourly on an incuocyte for HCT116 cells after treatment with 200 nM GNE-617 (extended version of Movie S3).

**Movie S10:** Full length 102 hours bright-field images captured hourly on an incuocyte for PC3 cells after treatment with 200 nM GNE-617 (extended version of Movie S4).

**Movie S11:** Close-up overlay of brightfield and yoyo-1 fluorescence over time after exposure of A549 cells to 200nM GNE-617.

**Movie S12:** Close-up overlay of brightfield and yoyo-1 fluorescence over time after exposure of Calu6 cells to 200nM GNE-617.
